# Supplementary material for: Sarcoma classification by DNA methylation profiling
Source: PubMed Central journal article supplement (PMC7819999; doi:10.1038/s41467-020-20603-4), 2021-01-21
Supplement: 41467_2020_20603_MOESM1_ESM.pdf [file 41467_2020_20603_MOESM1_ESM.pdf]

# Supplementary Figure 1

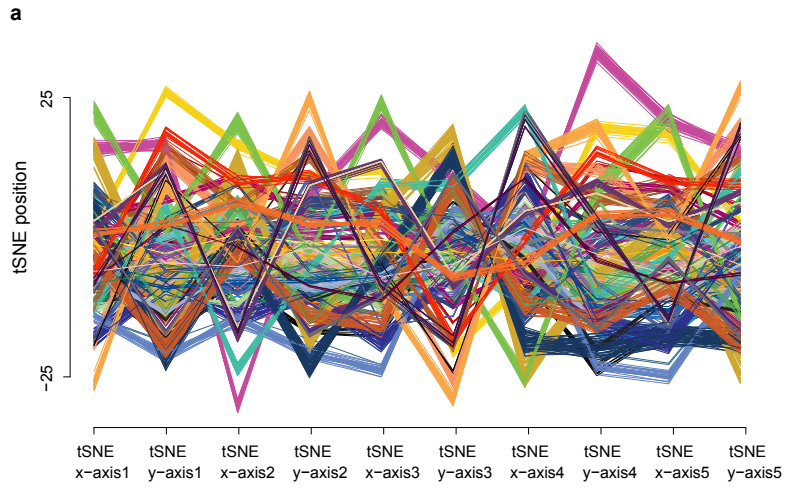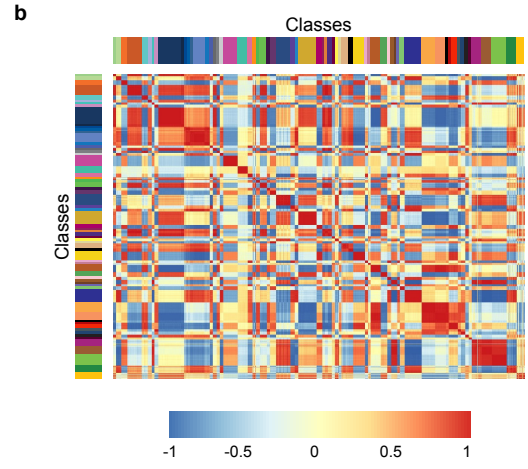

## Supplementary Figure 2

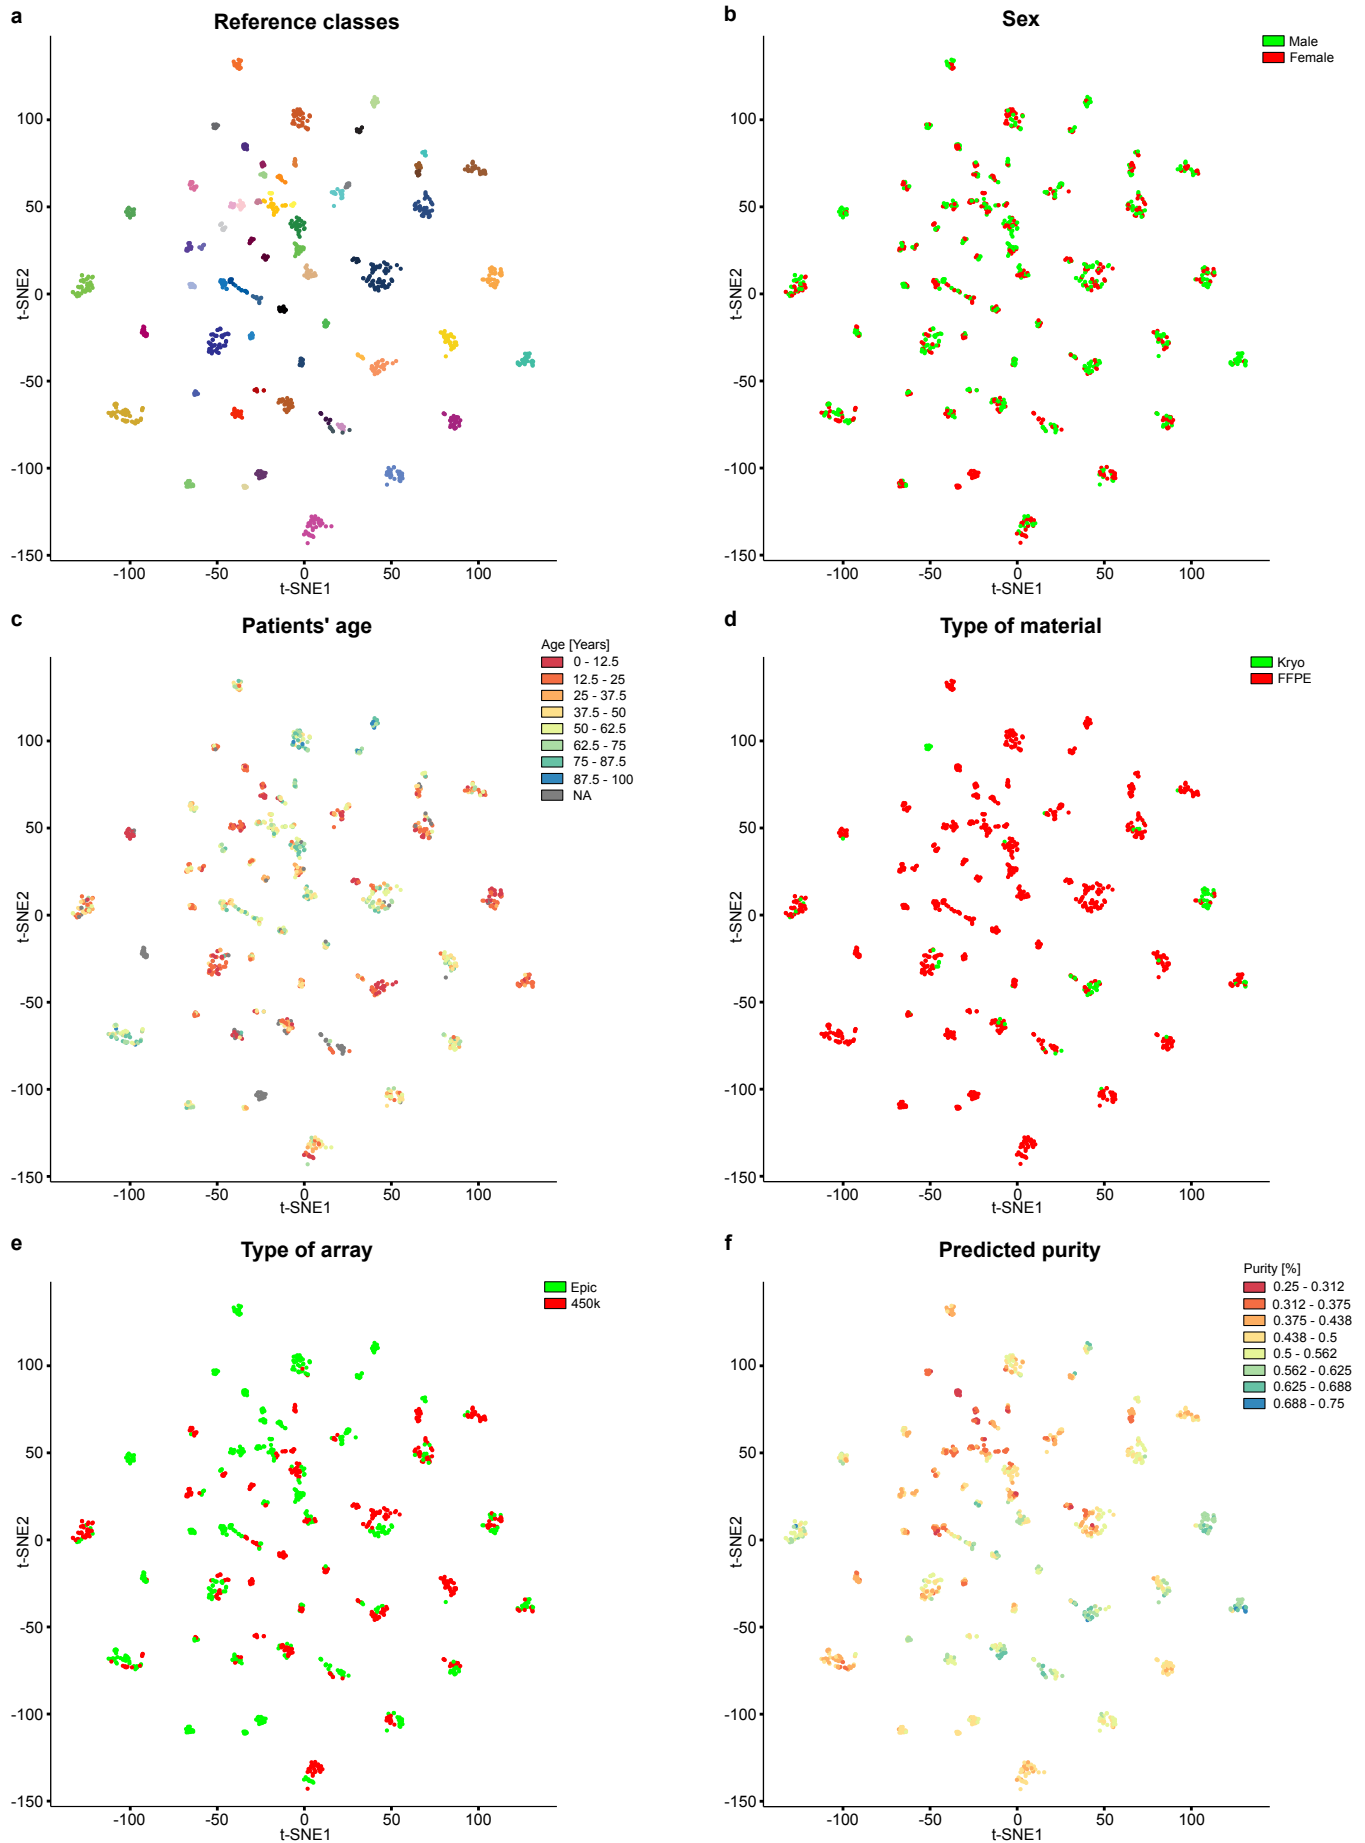

### Supplementary Figure 3

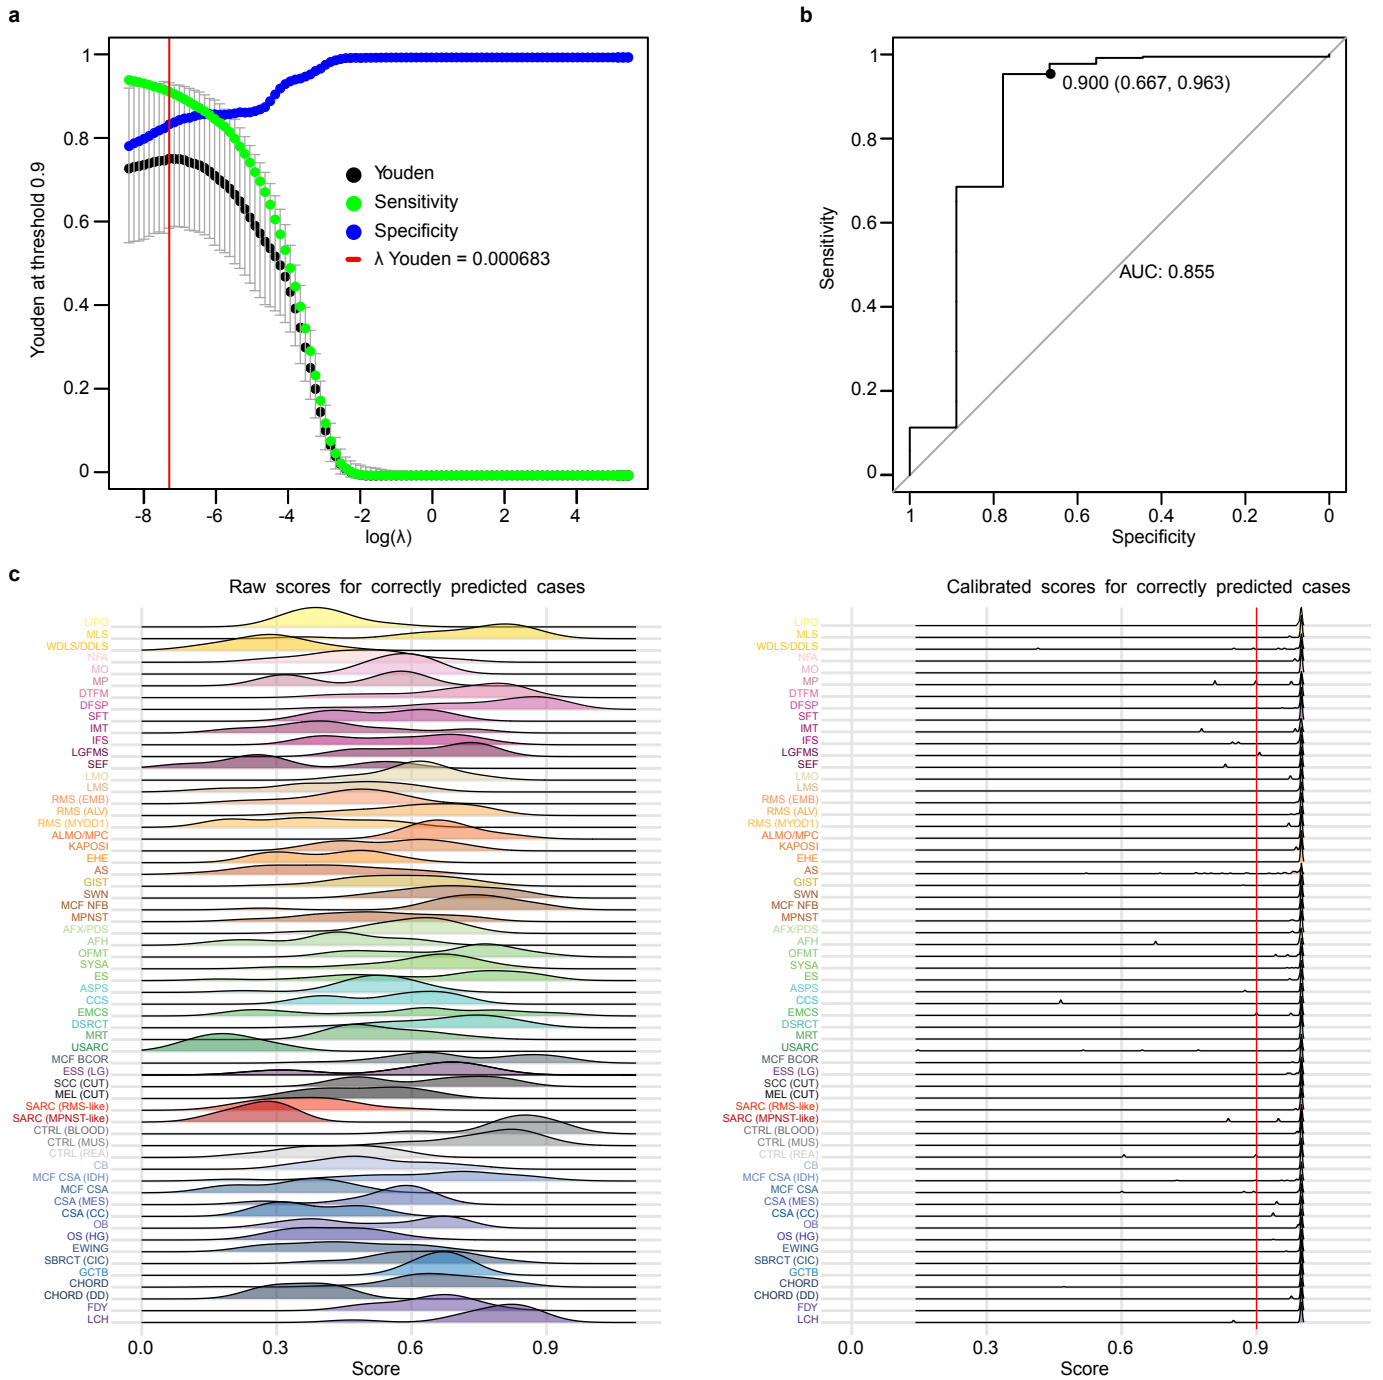



# Supplementary Figure 5

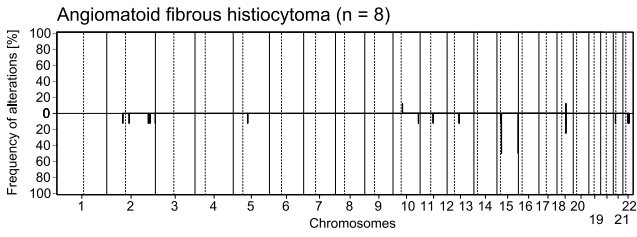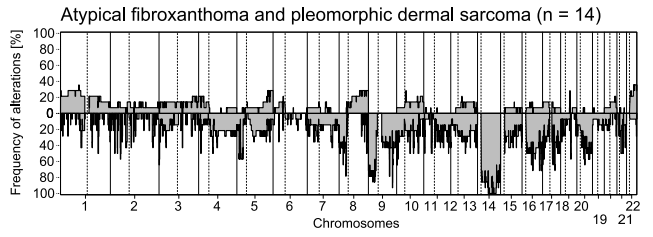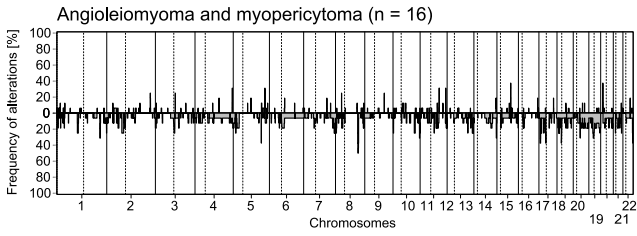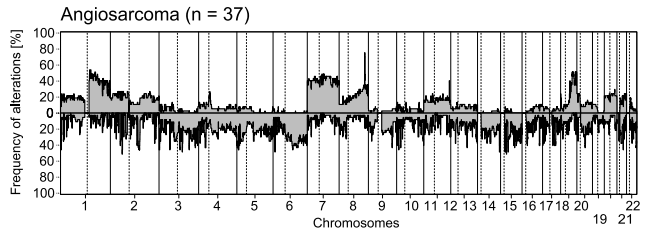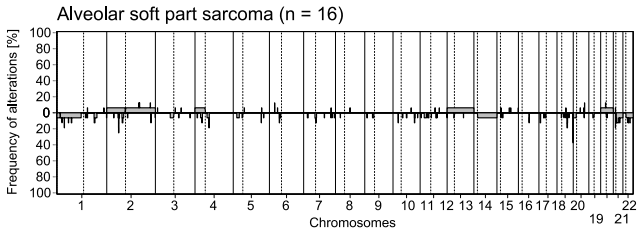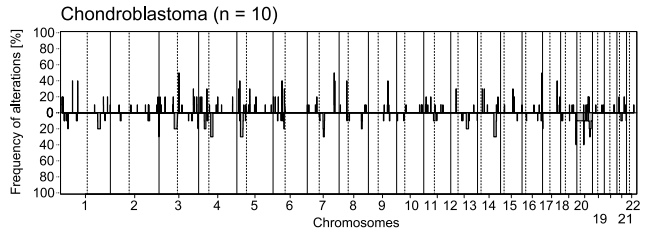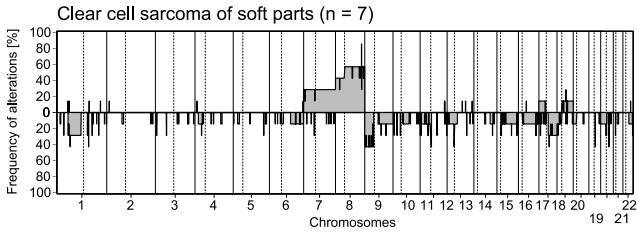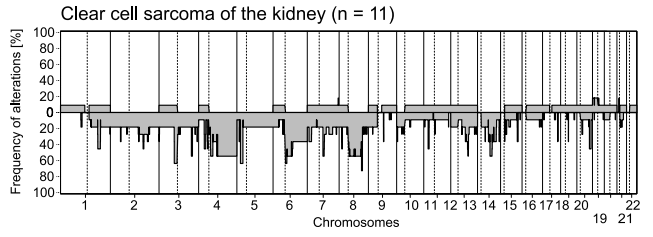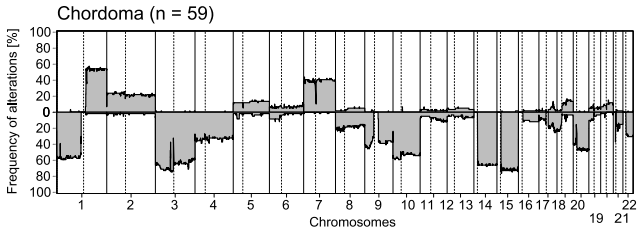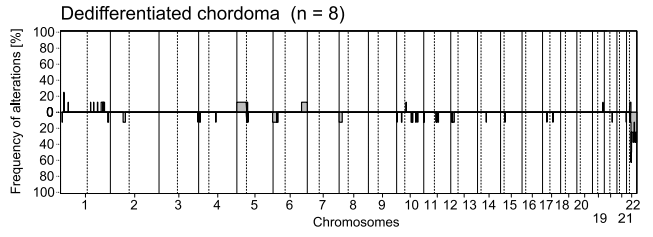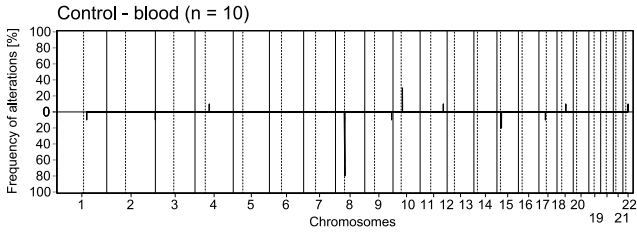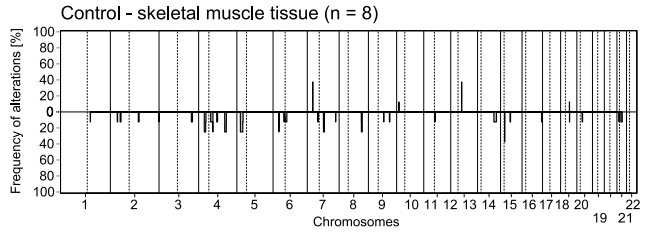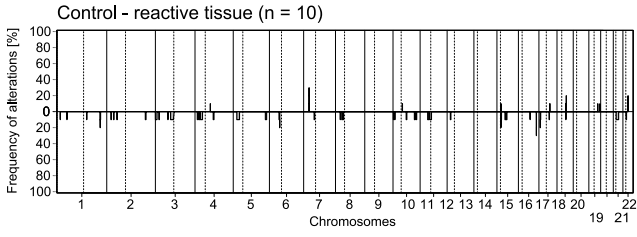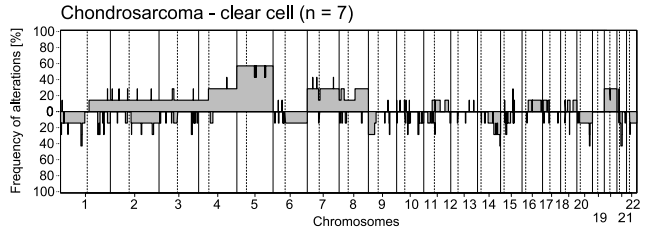

## Supplementary Figure 5 - page 2

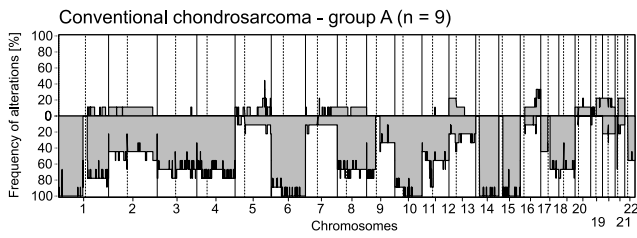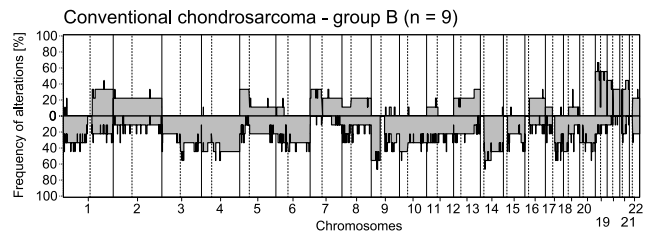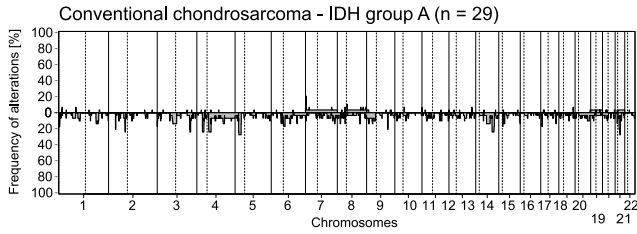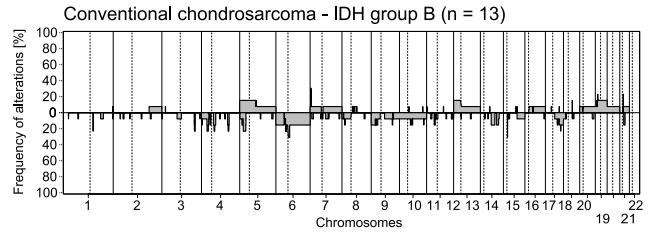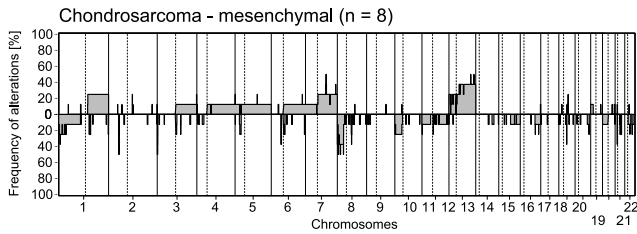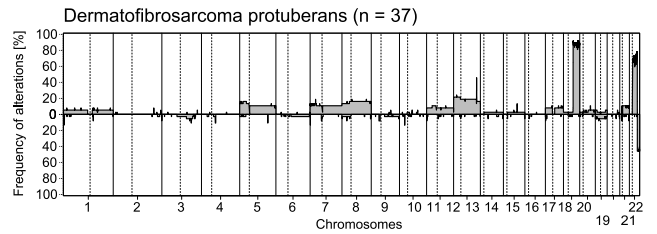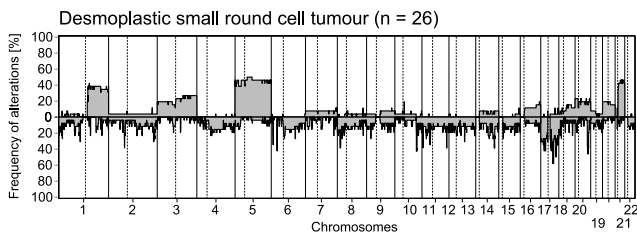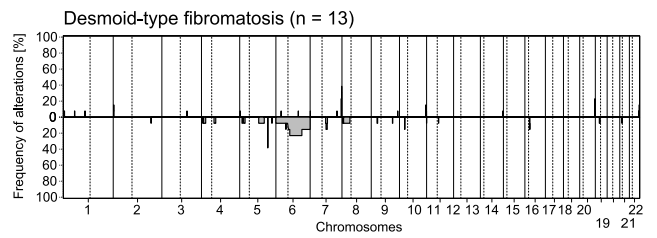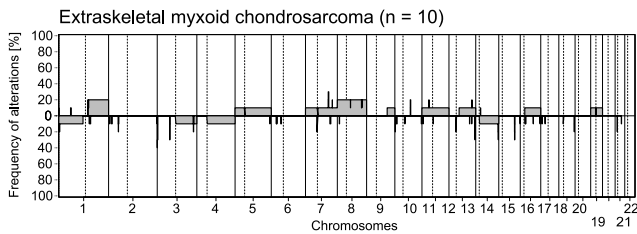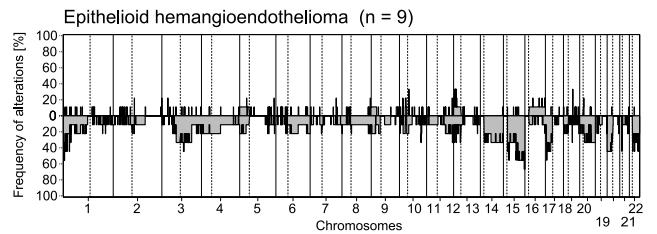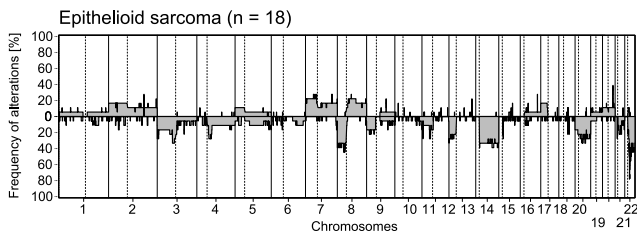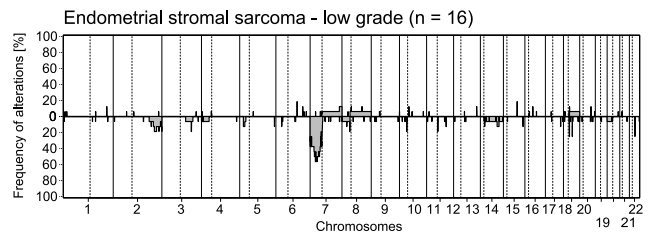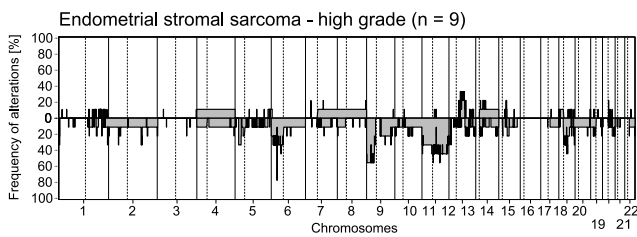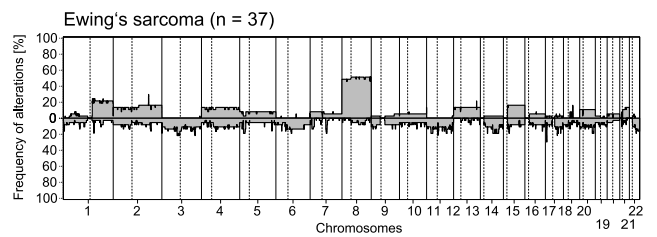

## Supplementary Figure 5 - page 3

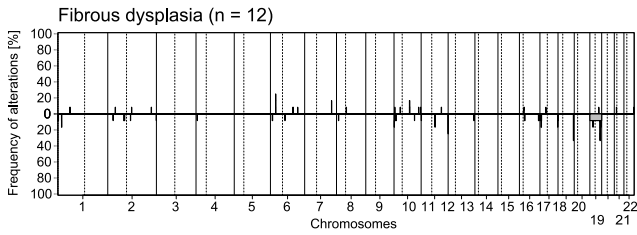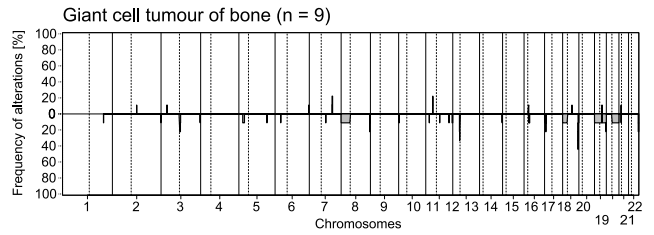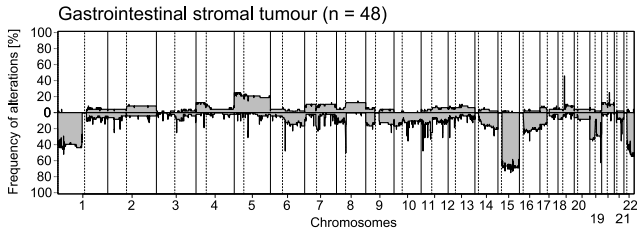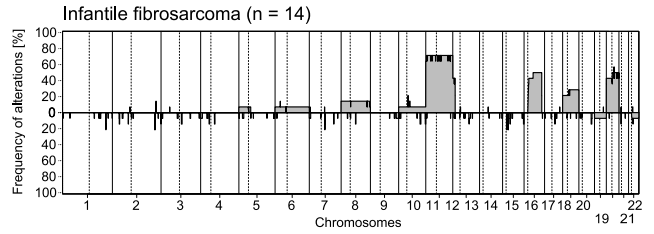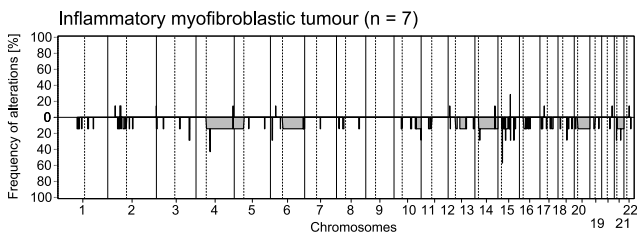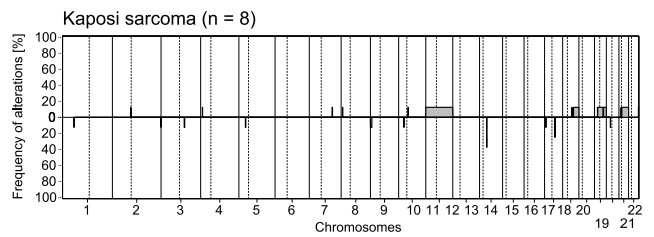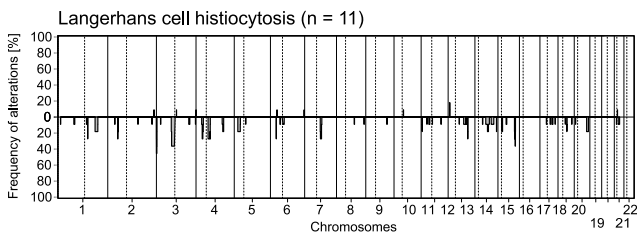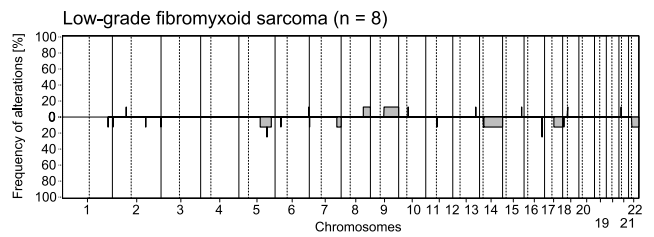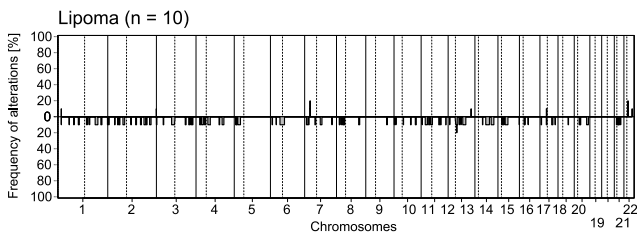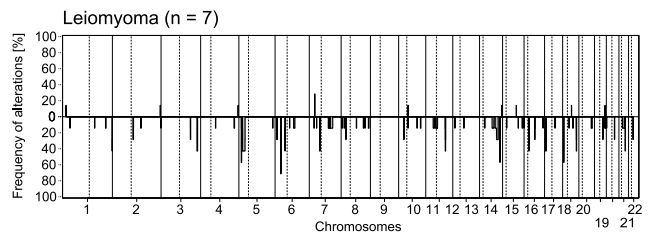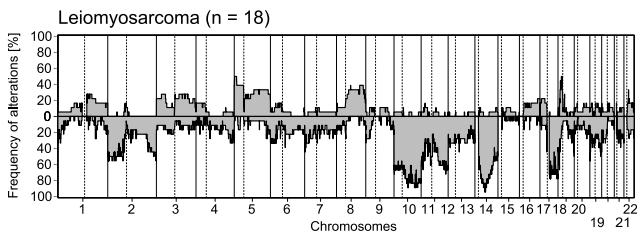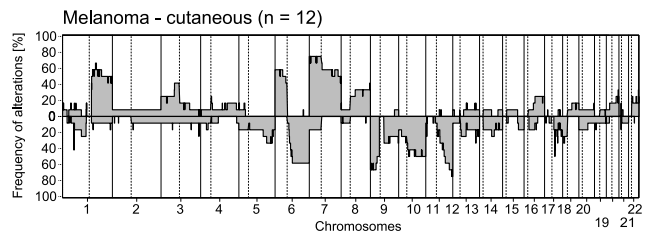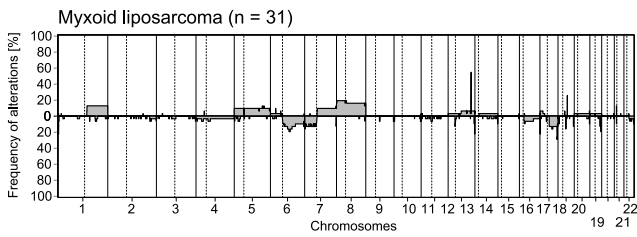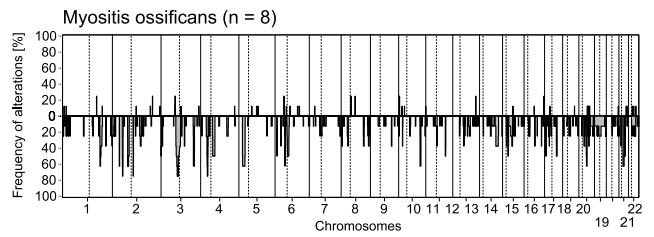

# Supplementary Figure 5 - page 4

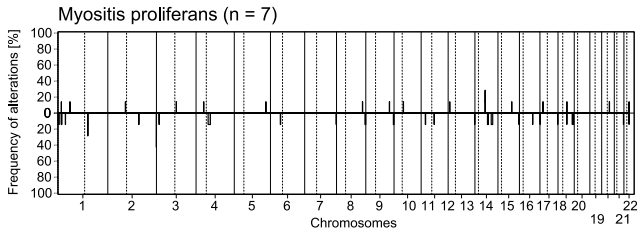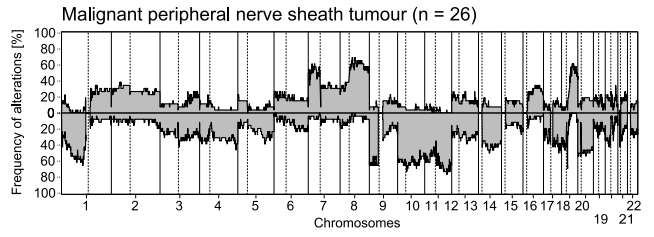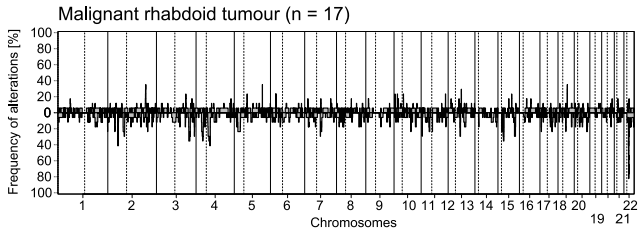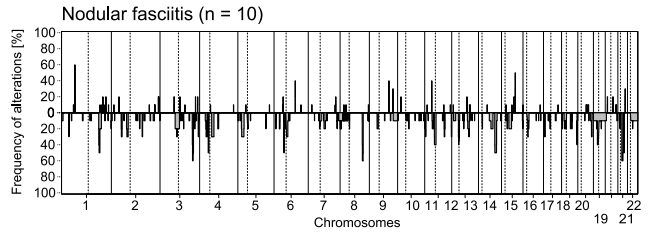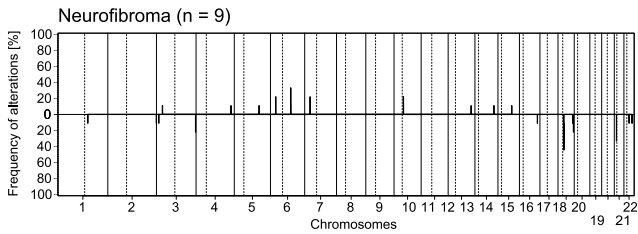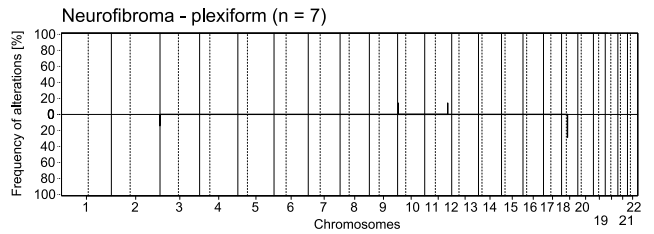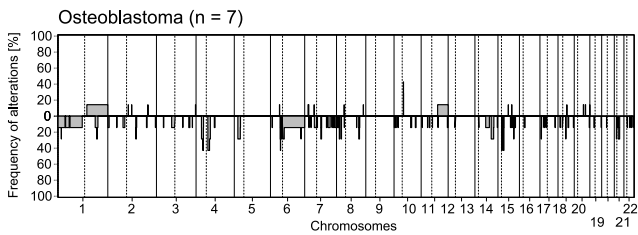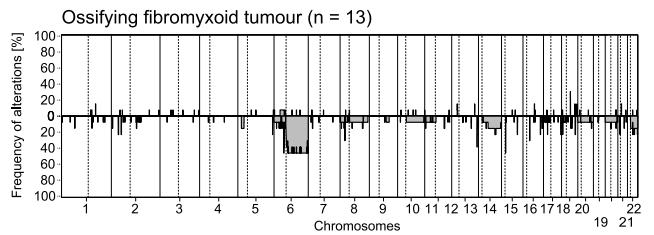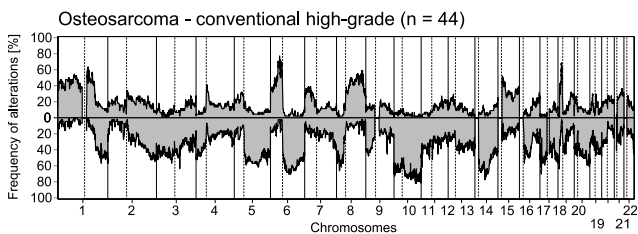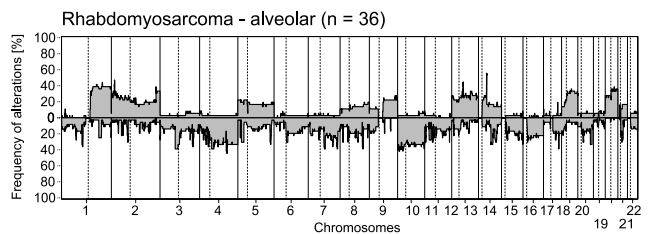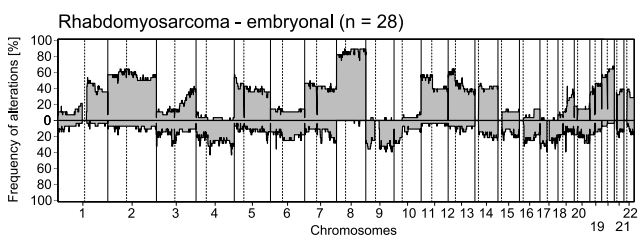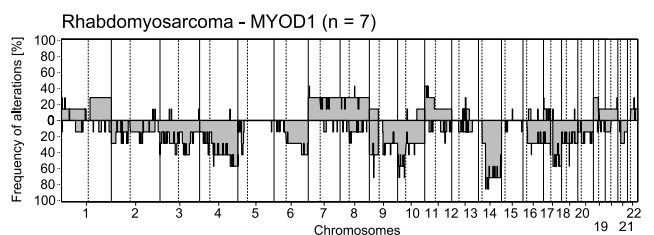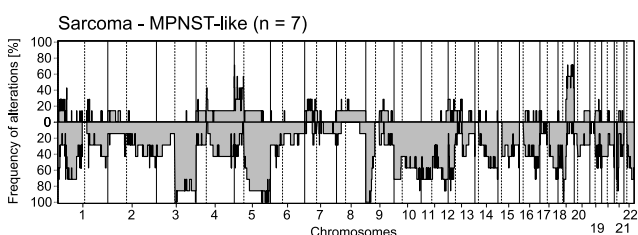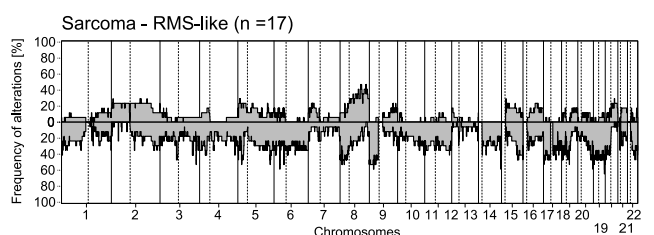



# Supplementary Figure 5 - page 5

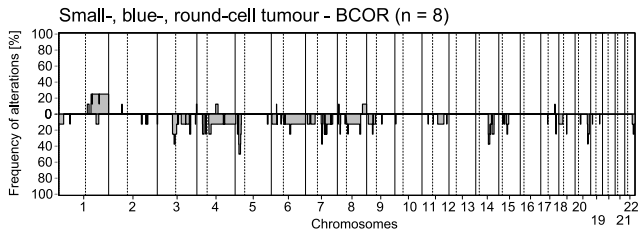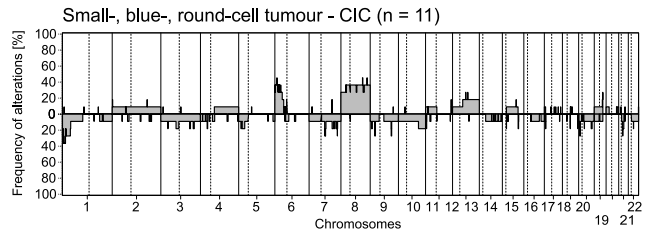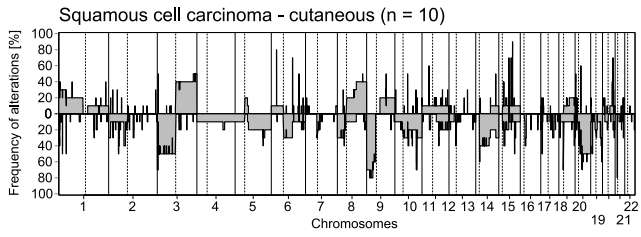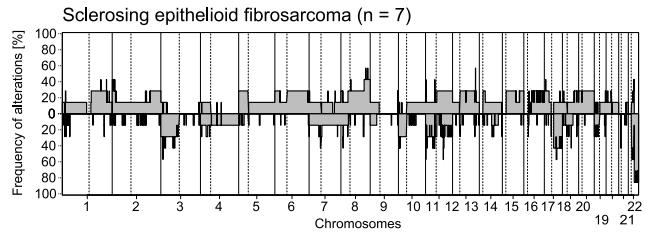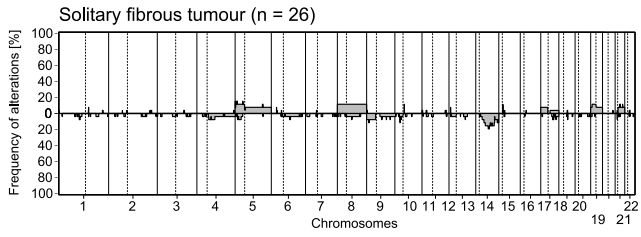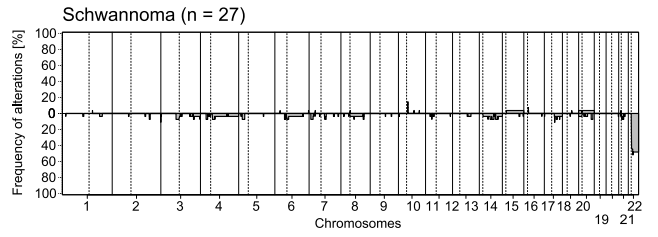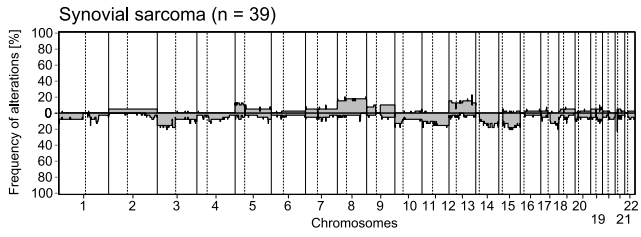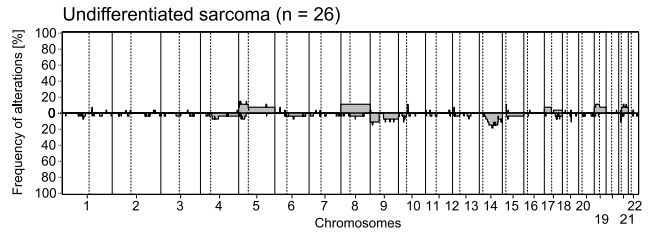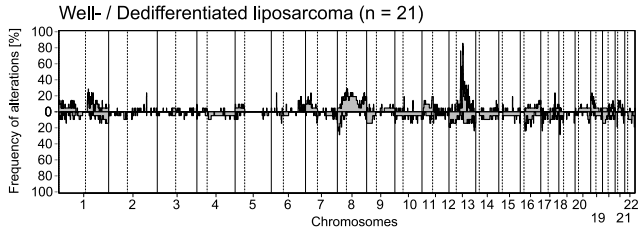

## Supplementary Figure 6

### Methylation profiling report

#### Supplier information

Sample identifier: **168142**  
 Sentrix ID: **203866300032\_R02C01**  
 Material type: **FFPE DNA**  
 Gender: **female**  
 Supplier diagnosis: -

| Automatic prediction                                                                                                             |          |   |
|----------------------------------------------------------------------------------------------------------------------------------|----------|---|
| Array type:                                                                                                                      | EPIC     |   |
| Material type:                                                                                                                   | FFPE DNA | ✓ |
| Gender:                                                                                                                          | female   | ✓ |
| Legend: ✓ OK    ⚠ Supplier information or prediction not available    ✗ Warning, mismatch of prediction and supplier information |          |   |

#### Sarcoma methylation classifier results (v12.2)

##### Methylation classes (MCs with score $\geq 0.3$ )

| Methylation class (MCs with score $\geq 0.3$ ) | Calibrated score | Interpretation |
|------------------------------------------------|------------------|----------------|
| methylation class sarcoma (RMS-like)           | 0.99             | match ✓        |

Legend: ✓ Match (score  $\geq 0.9$ )    ✗ No match (score  $< 0.9$ ): possibly still relevant for low tumor content and low DNA quality cases.    ● Match to MC family member (score  $\geq 0.5$ )

#### Class descriptions

**Methylation class sarcoma (RMS-like):** The methylation class "sarcoma (RMS-like)" is based on tumours with the histological diagnosis of malignant CNS sarcoma / tumour not otherwise specified. Median age is 7 years (age range 0 to 76). The molecular hallmark of this class are DICER1 mutations (>90%), either somatic or inherited, often together with MAPK pathway alterations (>70%). Copy number profiles range from relatively flat to complex. Rhabdomyosarcoma of the genitourinary tract with DICER1 mutations may also assign to this methylation class. The name given here is provisional.

#### Copy number variation profile

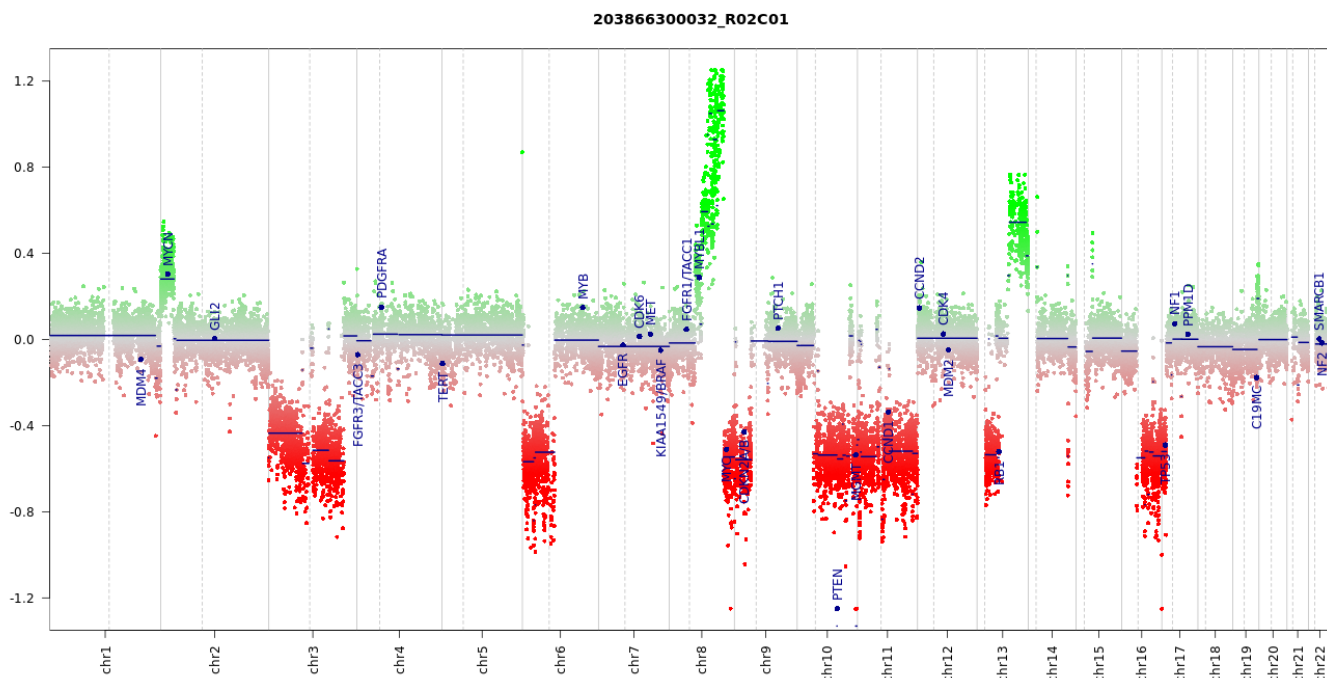

Depiction of chromosome 1 to 22 (and X/Y if automatic prediction was successful). Gains/amplifications represent positive, losses negative deviations from the baseline. 29 brain tumor relevant gene regions are highlighted for easier assessment.

(see Hovestadt & Zapatka, <http://www.bioconductor.org/packages/devel/bioc/html/conumee.html>)

# Supplementary Figure 7

a

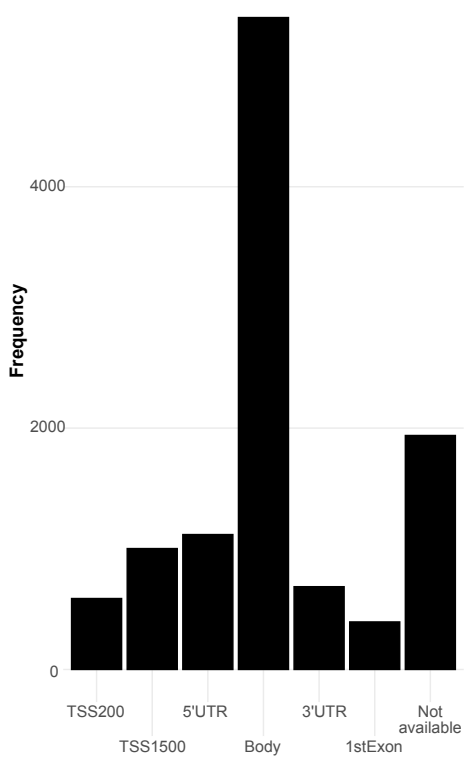

b

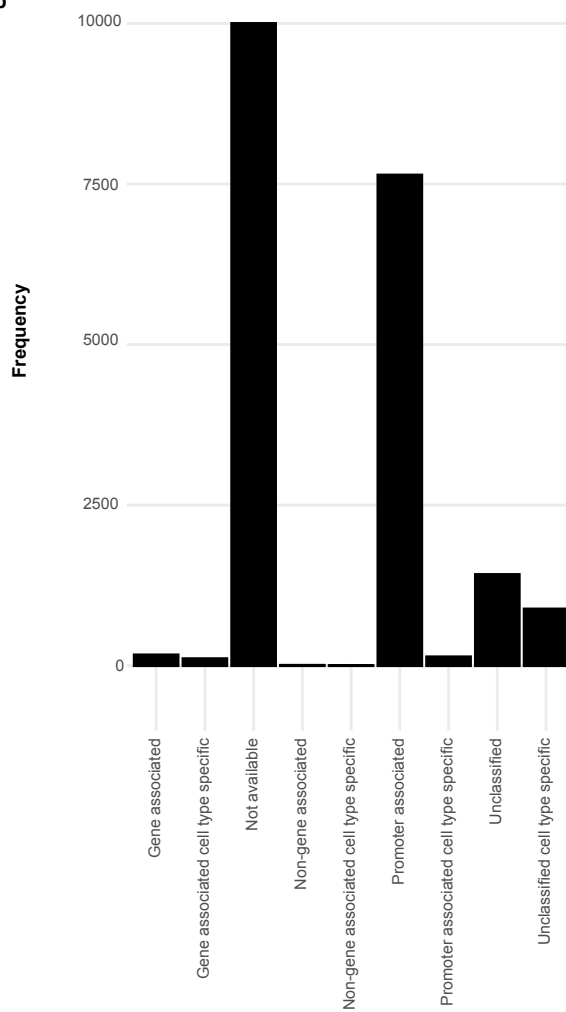

**Supplementary Figure 8**

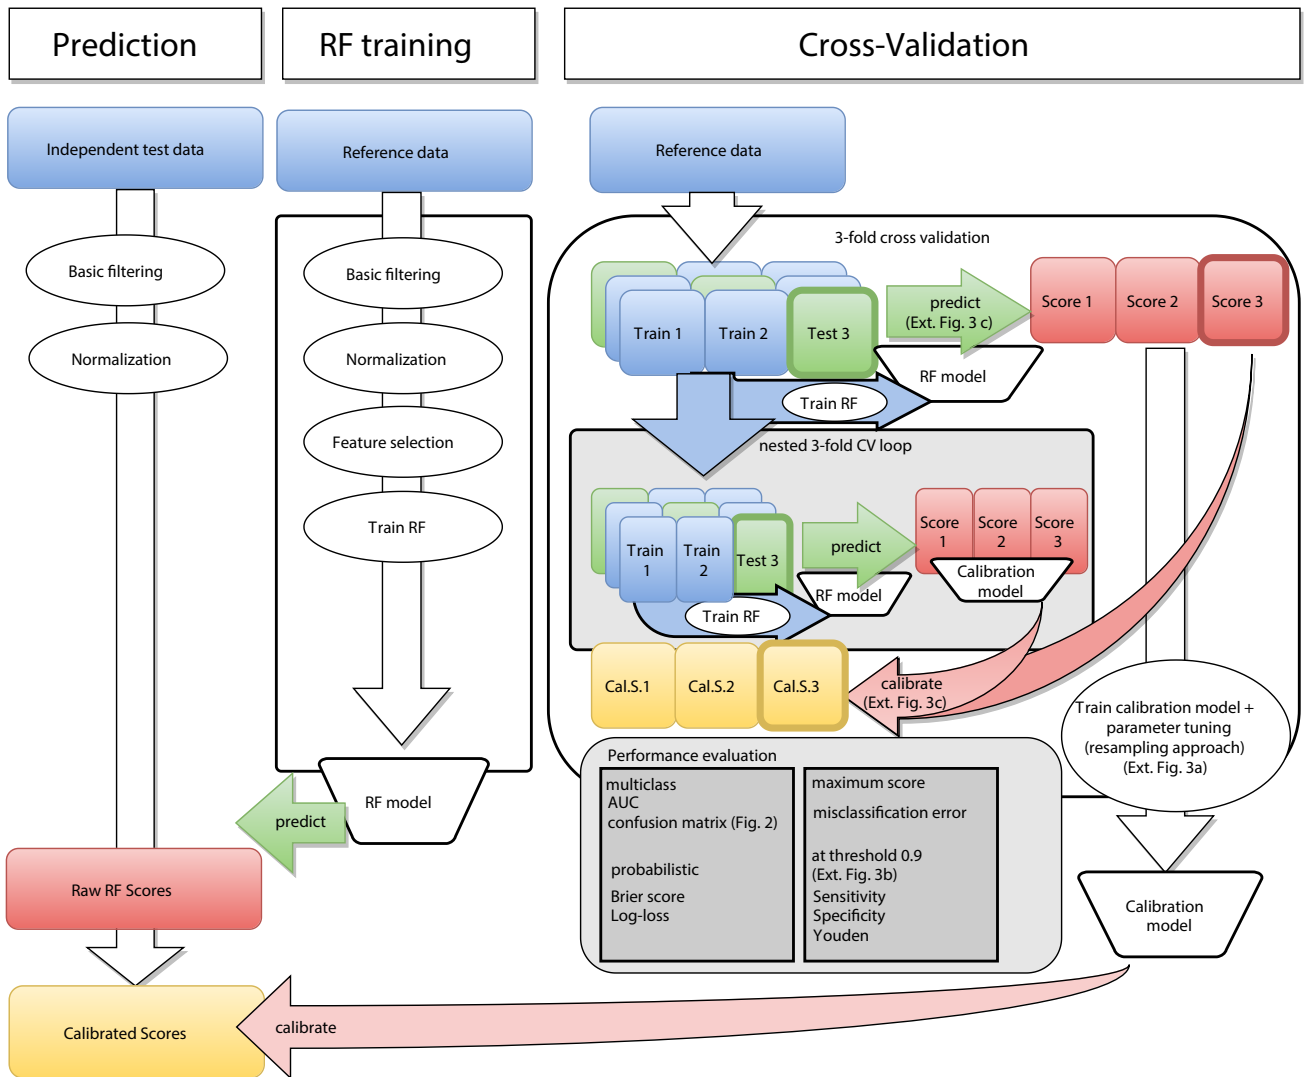

## Description of Additional Supplementary Files

### **Supplementary Figure 1: Methylation class stability of the sarcoma classifier.**

**a)** t-SNE position: t-SNE stability was assessed by performing separate t-SNE analyses of 500 datasets each generated by random down-sampling to 90% of the 1,077 cases. The class colours refer to Figure 1a. The depiction of the X and Y-axis positioning across the first 5 down-sampling iterations illustrates the close proximity of cases of the same class when perturbing the dataset. This indicates high group stability independent of the exact composition of the reference cohort. **b)** Pairwise correlation of X and Y coordinates for each case over the down sampling analysis demonstrates a very high correlation within classes (average correlation 0.9817) thereby indicating high stability of the t-SNE analysis.

### **Supplementary Figure 2: Unsupervised clustering is not biased by possible confounding factors.**

t-SNE representations of the reference cohort annotated with the potentially relevant confounding factors do not indicate confounding effects on the unsupervised t-SNE analysis. The colour code is identical to Fig. 1a. **a)** reference classes according to Figure 1b; **b)** gender distribution; **c)** patient age at diagnosis; **d)** type of material used for DNA extraction; **e)** DNA methylation array type; **f)** tumour cell purity prediction.

### **Supplementary Figure 3: Threshold definition and implementation of calibrated classifier scores.**

**a)** Illustration of the penalization parameter selection approach. The penalization parameter of the calibration models is selected such that at a fixed threshold of 0.9 the mean Youden index estimated over  $n = 500$  bootstrap iterations is maximal. Error bars indicate the standard deviation (SD) of the Youden index estimated over  $n = 500$  bootstrap iterations. **b)** Receiver

operating characteristic (ROC) curve for the calibrated maximum classifier methylation class family scores generated by cross-validation. The threshold 0.9 achieves a maximum specificity of 0.667 with a sensitivity of 0.963. Of note, the ROC curve illustrates the maximum score over all methylation classes. **c)** Overlaying density plots illustrating the distribution of cross-validated, raw and calibrated methylation class family classifier scores for correctly classified samples, depicted for each methylation class. The threshold 0.9 is highlighted by a red line.

#### **Supplementary Figure 4: Classifier prediction for the validation cohort.**

The colour indicates the relative frequency of samples with an initial diagnosis. The numbers in the heatmap denote the absolute number of samples. The abbreviations are identical to Figure 1a.

#### **Supplementary Figure 5: Overview of cumulative copy number profiles of the 65 methylation classes.**

Alterations above the zero-line indicate chromosomal gain, whereas alterations below the zero-line indicate chromosomal losses. The most frequent copy number variants are indicated in the methylation class descriptions (see Supplementary Data 2).

#### **Supplementary Figure 6: Report example of the sarcoma classifier.**

Sample website PDF report of a rare DICER1 associated CNS sarcoma matching with the methylation class Sarcoma (RMS-like).

#### **Supplementary Figure 7: Distribution of CpG positions utilized by the sarcoma classifier.**

The figure shows the distribution of the CpGs that are used by the classifier in relation to **a)** the functional gene subregion and **b)** their regulatory feature group.

**Supplementary Figure 8: Diagram of the development stages of the random forest classifier.**

The diagram shows how the classifier was trained and validated applying a 3x3 cross-validation. The nested cross-validation loop is needed to validate the score calibration.
